# Supplementary material
Source: ML conference proceedings conference paper supplement (https://proceedings.neurips.cc/paper_files/paper/2021/hash/70d355680e628fe1c552221f690d8da4-Abstract.html)
Supplement: Supplementary file 1 [file 70d355680e628fe1c552221f690d8da4-Supplemental.pdf]

## A Appendix

*Proof of Lemma 4.1.* Suppose that  $\alpha$  embeds  $\mathbf{O} = (O_1, \dots, O_p)$  in  $M \in \text{LNG}_d$  and that  $D = B_{\mathbf{O}}(M)$ . Suppose that  $D_{[v]} = aD_{[u]}$ . First, we show that at least one of  $u, v$  must be strictly greater than  $p$ . Suppose for a contradiction that  $u, v \leq p$ . Since  $D$  has ones everywhere on the diagonal of the principal  $p \times p$  submatrix,  $D_{uu} = D_{vv} = 1$ . By assumption, we have that  $D_{uv} = a > 0$  and  $D_{vu} = 1/a > 0$ . But then  $O_u \rightsquigarrow_M O_v$  and  $O_v \rightsquigarrow_M O_u$ , which contradicts acyclicity. Therefore, without loss of generality, we suppose that  $v > p$ .

Let  $y, z = \alpha^{-1}(u), \alpha^{-1}(v)$ . Let  $A = A(M)$  and  $B = B(M)$ . Let  $\beta$  be the permutation of  $\{1, \dots, d\}$  sending  $i \mapsto i$  for  $i < z$  and  $i \mapsto i - 1$  for  $i > z$ . Define the  $d - 1 \times d - 1$  matrix  $A'$  in the following way:

$$A'_{ij} = A_{\beta^{-1}(i), j} + A_{z, \beta^{-1}(j)} A_{\beta^{-1}(i), z}.$$

Since  $A$  has zeros on the diagonal and, by acyclicity, one of  $A_{z, \beta^{-1}(i)}, A_{\beta^{-1}(i), z}$  must be zero,  $A'$  has zeros on the diagonal. We show that  $A'$  is lower triangular, i.e. that  $A'_{ij} = 0$  whenever  $j > i$ . There are three cases to consider: (1)  $i < z, j < z$ ; (2)  $i < z, j \geq z$  and (3)  $i \geq z, j \geq z$ . In the first case  $A'_{ij} = A_{ij} + A_{zj} A_{iz}$ . Since  $A$  is lower triangular,  $A_{ij} = A_{iz} = 0$ . In the second case,  $A'_{ij} = A_{i, j+1} + A_{z, j+1} A_{iz}$ . Since  $A$  is lower triangular,  $A_{i, j+1} = A_{iz} = 0$ . In the final case,  $A'_{ij} = A_{i+1, j+1} + A_{z, j+1} A_{i+1, z}$ . Since  $A$  is lower triangular,  $A_{i+1, j+1} = A_{z, j+1} = 0$ .

Since  $I - A'$  is lower triangular and its diagonal entries are all equal to one, the inverse matrix  $B' = (I - A')^{-1}$  exists. We argue that  $B'_{ij} = B_{\beta^{-1}(i), j}$ . Let  $\Pi_{ij}$  be the set of all paths from  $i$  to  $j$  over the vertices  $\{1, \dots, d\}$ . Let  $\Pi_{ikj}$  be the set of all paths from  $i$  to  $j$  over the vertices  $\{1, \dots, d\}$  passing through  $k$  and let  $\Pi_{ikj} = \Pi_{ij} \setminus \Pi_{ikj}$ . Let  $\Pi'_{ij}$  be the set of all paths from  $i$  to  $j$  over the vertices  $\{1, \dots, d - 1\}$ . From our previous observation, we have that

$$B'_{ji} = \sum_{\pi \in \Pi'_{ij}} \prod_{i=1}^{|\pi|} A'_{\pi_{i+1}, \pi_i} \quad (1)$$

$$= \sum_{\pi \in \Pi'_{ij}} \prod_{i=1}^{|\pi|} (A_{\beta^{-1}(\pi_{i+1}), \pi_i} + A_{z, \beta^{-1}(\pi_i)} A_{\beta^{-1}(\pi_{i+1}), z}) \quad (2)$$

$$= \sum_{\pi \in \Pi_{\beta^{-1}(i) \neq \beta^{-1}(j)}} \prod_{i=1}^{|\pi|} (A_{\pi_{i+1}, \pi_i} + A_{z, \pi_i} A_{\pi_{i+1}, z}). \quad (3)$$

Note that for any  $\pi \in \Pi_{ij}$  there can be at most one  $\pi_i$  such that

$$A_{z, \pi_i} A_{\pi_{i+1}, z} \neq 0.$$

If this were not the case, there would be causal paths in  $G(M)$  passing through  $z$  twice, contradicting acyclicity. Let  $\pi_{i^*}$  be the unique such  $\pi_i$ , if it exists, and let  $\pi_{i^*} = \pi_1$ , otherwise. Then:

$$B'_{ji} = \sum_{\pi \in \Pi_{\beta^{-1}(i) \neq \beta^{-1}(j)}} \prod_{i=1}^{|\pi|} (A_{\pi_{i+1}, \pi_i} + A_{z, \pi_{i^*}} A_{\pi_{i^*+1}, z} \prod_{i \neq i^*} (A_{\pi_{i+1}, \pi_i})) \quad (4)$$

$$= \sum_{\pi \in \Pi_{\beta^{-1}(i) \neq \beta^{-1}(j)}} \prod_{i=1}^{|\pi|} (A_{\pi_{i+1}, \pi_i}) + \sum_{\pi \in \Pi_{\beta^{-1}(i) \neq \beta^{-1}(j)}} \prod_{i=1}^{|\pi|} (A_{\pi_{i+1}, \pi_i}) \quad (5)$$

$$= \sum_{\pi \in \Pi_{\beta^{-1}(i) \neq \beta^{-1}(j)}} \times_M \pi + \sum_{\pi \in \Pi_{\beta^{-1}(i) \neq \beta^{-1}(j)}} \times_M \pi \quad (6)$$

$$= \sum_{\pi \in \Pi_{\beta^{-1}(i), j}} \times_M \pi \quad (7)$$

$$= B_{\beta^{-1}(j), i}. \quad (8)$$

Let the  $d - 1$  element column vector  $\mathbf{e}'$  be just like the first  $d - 1$  rows of  $P_\beta \mathbf{e}(M)$  except  $\mathbf{e}'_{\beta(y)} = \mathbf{e}_y + a\mathbf{e}_z$ . Since the sum of independent non-Gaussian variables is non-Gaussian, each element of  $\mathbf{e}'$  is not Gaussian. Moreover, since functions of independent random variables are independent, the  $\mathbf{e}'_i$  are mutually independent.

Let  $\mathbf{X}' = B'\mathbf{e}'$ . Since  $B'$  is lower triangular with ones on the diagonal and  $\mathbf{e}'$  is a vector of mutually independent, non-Gaussian random variables, we have that  $M' = \langle \mathbf{X}', \mathbf{e}', A' \rangle$  is in  $\text{LNG}_{d-1}$ .

We are now in a position to prove part (i) of the theorem. We claim that  $\beta^{-1} \circ \alpha$  embeds  $\mathbf{O}$  into  $M'$ . In other words, we claim that  $O_i = \mathbf{X}_{\beta(\alpha^{-1}(i))}(M')$  :

$$\begin{aligned}
\mathbf{X}_{\beta(\alpha^{-1}(i))}(M') &= \sum_{j=1}^{d-1} B'_{\beta(\alpha^{-1}(i)),j} \mathbf{e}'_j \\
&= B'_{\beta(\alpha^{-1}(i)),\beta(y)} \mathbf{e}'_{\beta(y)} + \sum_{j < z, j \neq \beta(y)} B'_{\beta(\alpha^{-1}(i)),j} \mathbf{e}'_j + \sum_{j \geq z, j \neq \beta(y)} B'_{\beta(\alpha^{-1}(i)),j} \mathbf{e}'_j \\
&= B_{\alpha^{-1}(i),y} (\mathbf{e}_y + a\mathbf{e}_z) + \sum_{j < z, j \neq \beta(y)} B_{\alpha^{-1}(i),\beta^{-1}(j)} \mathbf{e}'_j + \sum_{j \geq z, j \neq \beta(y)} B_{\alpha^{-1}(i),\beta^{-1}(j)} \mathbf{e}'_j \\
&= B_{\alpha^{-1}(i),y} (\mathbf{e}_y + a\mathbf{e}_z) + \sum_{j < z, j \neq y} B_{\alpha^{-1}(i),j} \mathbf{e}_j + \sum_{j \geq z, j \neq y} B_{\alpha^{-1}(i),j+1} \mathbf{e}_{j+1} \\
&= B_{\alpha^{-1}(i),y} (\mathbf{e}_y + a\mathbf{e}_z) + \sum_{j < z, j \neq y} B_{\alpha^{-1}(i),j} \mathbf{e}_j + \sum_{j > z, j \neq y} B_{\alpha^{-1}(i),j} \mathbf{e}_j \\
&= aB_{\alpha^{-1}(i),y} \mathbf{e}_z + \sum_{j \neq z} B_{\alpha^{-1}(i),j} \mathbf{e}_j \\
&= \mathbf{X}_{\alpha^{-1}(i)}(M) \\
&= O_i.
\end{aligned}$$

The third and fourth equalities follows from the fact that  $B'_{ij} = B_{\beta^{-1}(i),j}$  and that  $\beta^{-1}(i) = i$  when  $i < z$  and  $\beta^{-1}(i) = i + 1$  when  $i \geq z$ . The penultimate equality follows from the fact that  $aB_{\alpha^{-1}(i),y} \mathbf{e}_z = aB_{\alpha^{-1}(i),\alpha^{-i}(u)} \mathbf{e}_z = aD_{i,u} \mathbf{e}_z = D_{i,v} \mathbf{e}_z = B_{\alpha^{-1}(i),\alpha^{-i}(v)} \mathbf{e}_z = B_{\alpha^{-1}(i),z} \mathbf{e}_z$ . The final equality follows from the fact that  $\alpha$  embeds  $\mathbf{O}$  in  $M$ .

We now prove (ii). Suppose that  $O_i \rightsquigarrow_M O_j$ . Since  $M$  is faithful,  $B_{\alpha^{-1}(j),i} \neq 0$  and therefore  $B'_{\beta(\alpha^{-1}(j)),i} \neq 0$ . That entails that  $\beta(\alpha^{-1}(i)) \rightsquigarrow_{M'} \beta(\alpha^{-1}(j))$  and, since  $\beta^{-1} \circ \alpha$  embeds  $\mathbf{O}$  in  $M'$ ,  $O_i \rightsquigarrow_{M'} O_j$ . For the converse it suffices to show that  $i \rightarrow_{M'} j$  entails  $\beta^{-1}(i) \rightsquigarrow_M \beta^{-1}(j)$ . Suppose the antecedent holds. Then  $A'_{ji} \neq 0$ . Therefore, either  $A_{\beta^{-1}(j),i} \neq 0$  or  $A_{z,\beta^{-1}(i)} A_{\beta^{-1}(j),z} \neq 0$ . In either case,  $\beta^{-1}(i) \rightsquigarrow_M \beta^{-1}(j)$ .

It remains to prove (iii). Suppose that  $i \rightsquigarrow_{M'} j$ . Then, by (ii),  $\beta^{-1}(i) \rightsquigarrow \beta^{-1}(j)$ . Since  $M$  is faithful,  $B_{\beta^{-1}(j),i} \neq 0$ . But since  $B_{\beta^{-1}(j),i} = B'_{j,i}$ ,  $B'_{j,i} \neq 0$ , as required.  $\square$
